# Supplementary material for: Cooperative activity of noggin and gremlin 1 in axial skeleton development
Source: Oxford University Press journal article supplement (doi:10.1242/dev.051938), 2011-02-08
Supplement: dev051938tables1.pdf [file dev051938tables1.pdf]

**Table S1. Primer sequences (5' to 3')**

| Gene           | Forward              | Reverse              |
|----------------|----------------------|----------------------|
| <i>Nog</i>     | TGTACGCGTGGAATGACCTA | GTGAGGTGCACAGACTTGGA |
| <i>Grem1</i>   | ACAGCGAAGAACCTGAGGAC | CAGCTGTTGGCAGTAGGGTC |
| <i>Pax1</i>    | CAATGACCTTCAAACACCGA | GGCAGTCCGTGTAAGCTACC |
| <i>Ptc</i>     | GCAAGTTTTTGGTTGTGGGT | TTCTCGACTCACTCGTCCAC |
| <i>Bmpr1a</i>  | GCTGTTCGGAGAAATTGGAA | TGAGGGAGGCTTCCTTACAG |
| <i>Pax1</i>    | CAATGACCTTCAAACACCGA | GGCAGTCCGTGTAAGCTACC |
| <i>Lbx1</i>    | AGACCTTTAAGGGGCTGGAG | GTGATTTTCGCCGTTTCTTG |
| $\beta$ -actin | GACGGCCAGGTCATCACTAT | CTTCTGCATCCTGTCAGCAA |
| <i>Gapdh</i>   | CGTCCCGTAGACAAAATGGT | TTGATGGCAACAATCTCCAC |

All annealing at 60°C.
